# Supplementary material for: Genetic Diversity and Population Structure of the Chinese Mitten Crab (Eriocheir sinensis) from Six Different Lakes Using Microsatellites
Source: MDPI journal article supplement (doi:10.3390/fishes8050220), 2023-04-23
Supplement: s1 [file s1]

# Genetic Diversity and Population Structure of the Chinese Mitten Crab (*Eriocheir sinensis*) from Six Different Lakes Using Microsatellites

Shengyan Su <sup>1,2</sup>, Jean Damascene Nsekanabo <sup>1</sup>, Brian Pelekelo Munganga <sup>1,3</sup>, Xinjin He <sup>2</sup>, Jianlin Li <sup>2</sup>, Fan Yu <sup>2</sup>, Meiyao Wang <sup>2</sup> and Yongkai Tang <sup>1,2,\*</sup>

<sup>1</sup> Wuxi Fisheries College, Nanjing Agricultural University, Wuxi 214081, China; brijelimunga@gmail.com (B.P.M.)

<sup>2</sup> Key Laboratory of Integrated Rice-Fish Farming Ecology, Ministry of Agriculture and Rural Affairs, Freshwater Fisheries Research Center, Chinese Academy of Fishery Sciences, Wuxi 214081, China;

<sup>3</sup> Centre for Innovative Approach Zambia, Lusaka 00000, Zambia

\* Correspondence: tangyk@ffrc.cn

**Table S1.** 13 pairs of microsatellite primers used to detect the genetic diversity of Chinese mittens crabs.

| Name     | Forward ( )             | Backward ( )            | Size    | Temperature(°C) | Label |
|----------|-------------------------|-------------------------|---------|-----------------|-------|
| crab1    | CCGAACAGTGACGGTTACCA    | TAGCCCTAATCCCGGGATCC    | 180     | 56              | FAM   |
| crab20   | CTGGCCAGTCCGTAAGTCAG    | TTGACTGACCGTTGGACTGG    | 278     | 56              | VIC   |
| crab2    | GGGTACTCATCCAGGAAGGTG   | ACAGTCTGTCTGGGAAGCTTC   | 180     | 56              | FAM   |
| crab11   | AAGATCCTCGTGACGTCTG     | AACACAACGTATGCATCTGAGA  | 279     | 56              | FAM   |
| crab18   | CTCGTGACGTCTGGGATT      | TGGCAATAACACAACGTATGCA  | 280     | 56              | VIC   |
| crab15   | TCTGTCAGTCAGTCAATCATTCA | CAAAGCCCTCGTGAACCAGA    | 280     | 56              | VIC   |
| crab6    | TGGGAGTCCCTCAGTCACTT    | AGTAGTACTTCTGCCTGCTGC   | 179     | 56              | FAM   |
| crab17   | GGAAAGGTGATCGGCCCTAC    | CCTCCCTGTCTCACTCACT     | 280     | 56              | VIC   |
| crab8    | CCCACAGGTGTTACGCG       | CTGTTGGTCTGTTTCTGCCTC   | 179     | 56              | FAM   |
| crab12   | TGGACGTGCTTTCATCTCTCT   | TTTTCGGCAACACCAGCAAC    | 279     | 56              | VIC   |
| Esin42   | GCACCGCAGTGATAATGTAGTGG | GATCCTCGTGTGGGCGTGCTTAC | 215-281 | 56              | FAM   |
| HLJEsa42 | ACCCTCAGCAGTTATCGTG     | CGTACAACAAAGGCAAG       | 300-366 | 56              | VIC   |
| crab21   | CCACCAGGATGTCAACTCGT    | GGAAGAGGAGGAGGAGAGGT    | 280     | 56              | VIC   |

**Table S2.** Genotypic linkage disequilibrium for each locus pair across all populations.

| Locus1 | Locus2 | Chi2     | df   | p-Value |
|--------|--------|----------|------|---------|
| crab1  | crab20 | 16.540   | 12   | 0.168   |
| crab1  | crab2  | 2.915    | 4    | 0.572   |
| crab20 | crab2  | 1.470    | 4    | 0.832   |
| crab1  | crab11 | 13.912   | 12   | 0.306   |
| crab20 | crab11 | 7.695    | 12   | 0.808   |
| crab2  | crab11 | 3.142    | 4    | 0.534   |
| crab1  | crab18 | 13.671   | 12   | 0.322   |
| crab20 | crab18 | 13.960   | 12   | 0.303   |
| crab2  | crab18 | 2.903    | 4    | 0.574   |
| crab11 | crab18 | >191.308 | 1712 | 0.001   |
| crab1  | crab15 | 5.809    | 12   | 0.925   |
| crab20 | crab15 | 22.563   | 12   | 0.031   |
| crab2  | crab15 | 4.411    | 4    | 0.353   |
| crab11 | crab15 | 8.325    | 12   | 0.759   |

|        |          |         |     |       |
|--------|----------|---------|-----|-------|
| crab18 | crab15   | 11.067  | 12  | 0.523 |
| crab1  | crab6    | 9.175   | 12  | 0.688 |
| crab20 | crab6    | 9.509   | 12  | 0.659 |
| crab2  | crab6    | 2.336   | 4   | 0.674 |
| crab11 | crab6    | 14.209  | 12  | 0.287 |
| crab18 | crab6    | 16.437  | 12  | 0.172 |
| crab15 | crab6    | 22.426  | 12  | 0.033 |
| crab1  | crab17   | 16.462  | 12  | 0.171 |
| crab20 | crab17   | 16.422  | 12  | 0.173 |
| crab2  | crab17   | 1.622   | 4   | 0.805 |
| crab11 | crab17   | 6.483   | 12  | 0.890 |
| crab18 | crab17   | 10.522  | 12  | 0.570 |
| crab15 | crab17   | 10.393  | 12  | 0.581 |
| crab6  | crab17   | 9.781   | 12  | 0.635 |
| crab1  | crab8    | 12.835  | 12  | 0.381 |
| crab20 | crab8    | 18.715  | 12  | 0.095 |
| crab2  | crab8    | 3.935   | 4   | 0.415 |
| crab11 | crab8    | 7.443   | 12  | 0.827 |
| crab18 | crab8    | 8.635   | 12  | 0.733 |
| crab15 | crab8    | 19.852  | 12  | 0.069 |
| crab6  | crab8    | 11.049  | 12  | 0.524 |
| crab17 | crab8    | 10.289  | 12  | 0.590 |
| crab1  | crab12   | 14.595  | 12  | 0.264 |
| crab20 | crab12   | 24.476  | 12  | 0.017 |
| crab2  | crab12   | 5.756   | 4   | 0.218 |
| crab11 | crab12   | 9.495   | 12  | 0.660 |
| crab18 | crab12   | 15.548  | 12  | 0.212 |
| crab15 | crab12   | 15.104  | 12  | 0.235 |
| crab6  | crab12   | 11.772  | 12  | 0.464 |
| crab17 | crab12   | 10.154  | 12  | 0.602 |
| crab8  | crab12   | 20.802  | 12  | 0.053 |
| crab1  | Esin42   | 5.111   | 12  | 0.954 |
| crab20 | Esin42   | >41.487 | 112 | 0.001 |
| crab2  | Esin42   | 2.701   | 4   | 0.608 |
| crab11 | Esin42   | 17.117  | 12  | 0.145 |
| crab18 | Esin42   | 13.942  | 12  | 0.304 |
| crab15 | Esin42   | 15.775  | 12  | 0.201 |
| crab6  | Esin42   | 16.619  | 12  | 0.164 |
| crab17 | Esin42   | 7.482   | 12  | 0.824 |
| crab8  | Esin42   | 26.501  | 12  | 0.001 |
| crab12 | Esin42   | >51.132 | 912 | 0.001 |
| crab1  | HLJEsa42 | 9.744   | 12  | 0.638 |
| crab20 | HLJEsa42 | 17.398  | 12  | 0.135 |
| crab2  | HLJEsa42 | 4.603   | 4   | 0.330 |
| crab11 | HLJEsa42 | 9.837   | 12  | 0.630 |
| crab18 | HLJEsa42 | 20.404  | 12  | 0.059 |
| crab15 | HLJEsa42 | 14.648  | 12  | 0.261 |
| crab6  | HLJEsa42 | 5.098   | 12  | 0.954 |
| crab17 | HLJEsa42 | 10.841  | 12  | 0.542 |
| crab8  | HLJEsa42 | 18.346  | 12  | 0.105 |
| crab12 | HLJEsa42 | 31.806  | 12  | 0.001 |

---

|          |          |         |     |       |
|----------|----------|---------|-----|-------|
| Esin42   | HLJEsa42 | >66.932 | 112 | 0.001 |
| crab1    | crab21   | 19.426  | 12  | 0.078 |
| crab20   | crab21   | 15.397  | 12  | 0.220 |
| crab2    | crab21   | 4.964   | 4   | 0.290 |
| crab11   | crab21   | 9.925   | 12  | 0.622 |
| crab18   | crab21   | 13.512  | 12  | 0.332 |
| crab15   | crab21   | 14.306  | 12  | 0.281 |
| crab6    | crab21   | 11.831  | 12  | 0.459 |
| crab17   | crab21   | 7.672   | 12  | 0.810 |
| crab8    | crab21   | 6.420   | 12  | 0.893 |
| crab12   | crab21   | 21.342  | 12  | 0.045 |
| Esin42   | crab21   | 12.618  | 12  | 0.397 |
| HLJEsa42 | crab21   | 11.658  | 12  | 0.473 |

---
